# Supplementary material
Source: PubMed Central journal article supplement (PMC4473206)

1 Figure S1:

2 Phylogenetic trees of *Mycobacterium* species for highly conserved regions using sequences trimmed to those  
3 available for *M. llatzerense* type strain MG13<sup>T</sup> demonstrate clustering of strain CLUC14 from this study with  
4 other *M. llatzerense* strains. The aligned regions include 730 bp of the *recA* gene (A), 251 bp of the 16S – 23S  
5 *rRNA* gene internal transcribed spacer (ITS) sequence (B), 382 bp of the *hsp65* gene (C) and 665 bp of the *rpoB*  
6 gene (D). The top 25 aligning sequences by BLASTn against GenBank NT database were used for the  
7 phylogenetic tree, except for the ITS where 17 sequences having E-values < 1e-15 were used.

8

A

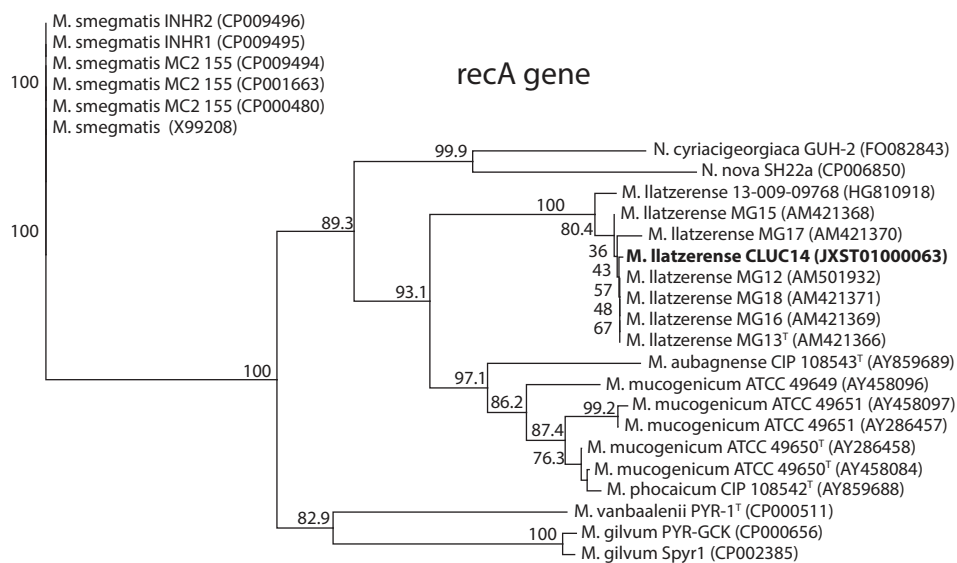

B

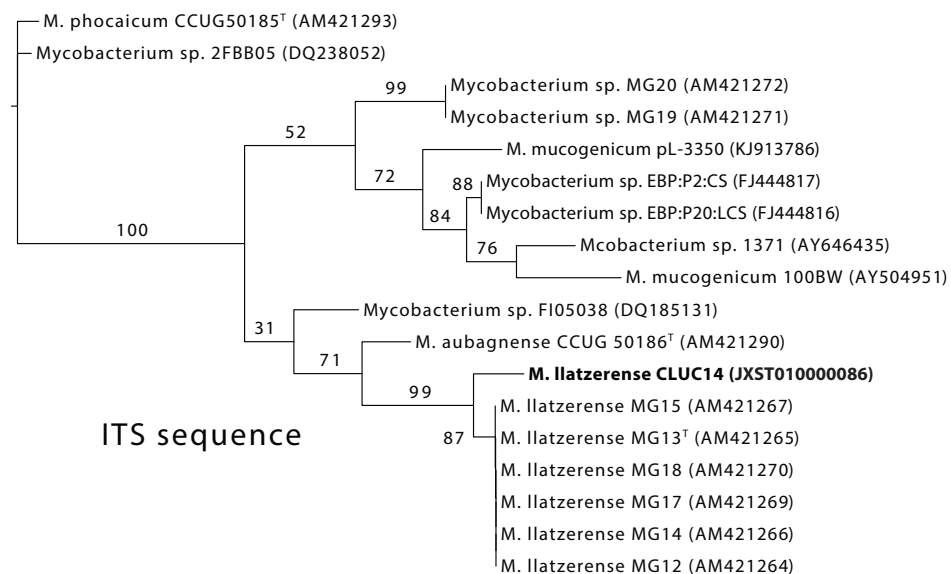

C

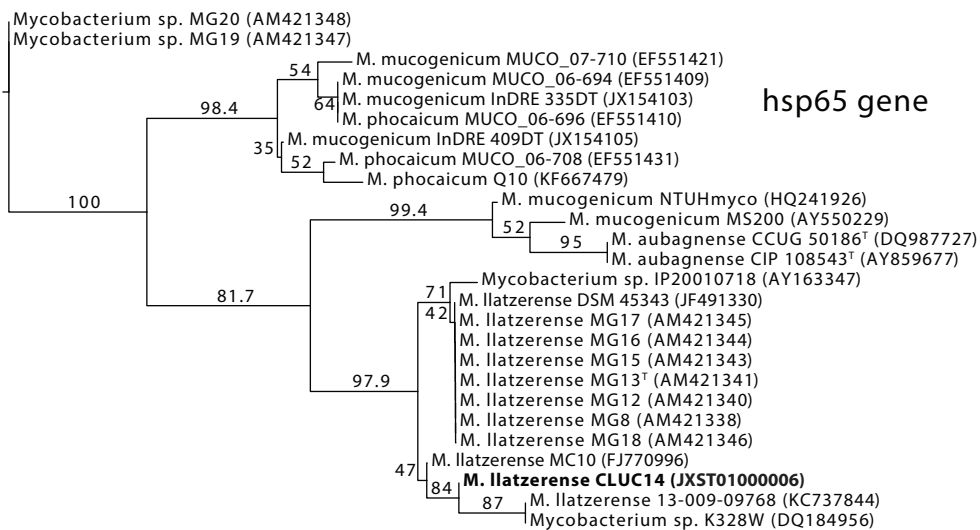

D

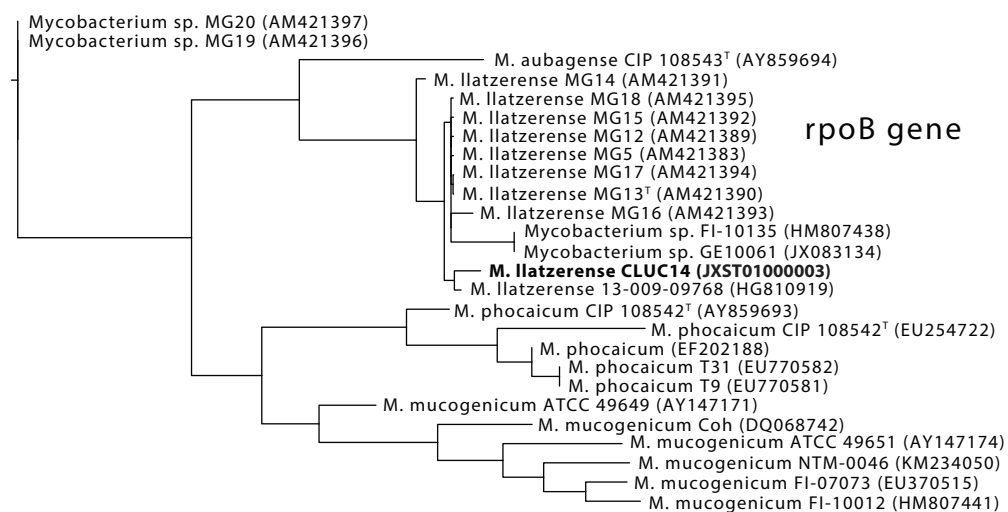

Supplement: JCM.00402-15_zjm999094331so1.pdf [file JCM.00402-15_zjm999094331so1.pdf]
